# Supplementary material for: Using optical sensors to assess the impact of infrequent sampling on the uncertainty of stream annual mean turbidity and total phosphorus concentrations, and how this can affect the water quality status
Source: Research Square preprint supplement (doi:10.21203/rs.3.rs-6436252/v1), 2025-05-14
Supplement: Supplementary file 1 [file 479493d2acfe7c2766ea3922.docx]

**Supplementary materials**

**Article title:** Using optical sensors to assess the impact of infrequent sampling on the uncertainty of stream annual mean turbidity and total phosphorus concentrations, and how this can affect the water quality status

**Journal name**: Environmental Monitoring and Assessment

**Authors**:

Eva Skarbøvik(a), Anastasija Isidorova(a), Maria Kämäri(b), Pasi Valkama(b), Sofie G.M. van’t Veen(c), Emma E. Lannergård(d), Jens Fölster(d), and Brian Kronvang(e)

**Affiliations:**

aNorwegian Institute of Bioeconomy Research (NIBIO), Division of Environment and Natural Resources, P.O. Box 115, 1431 As, Norway

bFinnish Environment Institute (Syke), Marine and freshwater solutions, Latokartanonkaari, 11, FI-00790 Helsinki, Finland

cAarhus University, Department of Ecoscience, C.F. Møllers Allé, DK-8000 Aarhus C, Denmark and Envidan A/S, Vejlsøvej, 23, DK-8600 Silkeborg, Denmark

dSwedish University of Agricultural Sciences, Department of Aquatic Sciences and Assessment, PO Box 7050, 750 07 Uppsala, Sweden

eAarhus University, Department of Ecoscience, C.F. Møllers Allé 3, DK-8000 Aarhus C, Denmark

**Corresponding author:** Eva Skarbøvik, Norwegian Institute of Bioeconomy Research (NIBIO), Division of Environment and Natural Resources, P.O. Box 115, 1431 As, Norway

Mail address corresponding author: [eva.skarbovik@nibio.no](mailto:eva.skarbovik@nibio.no)

**Mail addresses to the co-authors:**

Anastasija Isidorova: [anastasija.isidorova@nibio.no](mailto:anastasija.isidorova@nibio.no)

Maria Kämäri: [maria.kamari@syke.fi](mailto:maria.kamari@syke.fi)

Pasi Valkama: [Pasi.Valkama@syke.fi](mailto:Pasi.Valkama@syke.fi)

Sofie Gyritia Madsen van't Veen: [svv@ecos.au.dk](mailto:svv@ecos.au.dk)

Emma Lannergård: [emma.lannergard@slu.se](mailto:emma.lannergard@slu.se)

Jens Fölster: [Jens.Folster@slu.se](mailto:Jens.Folster@slu.se)

Brian Kronvang: [bkr@bios.au.dk](mailto:bkr@bios.au.dk)

**Supplementary tables**

**Table S-I** Sensors used in the study, with measuring technique and range used

|  | Sensor brand and type | Measuring technique | Range  (NTU/FNU) |
| --- | --- | --- | --- |
| SE | YSI 600OMV-VS, YSI EXO2, In Situ Aquatroll600 | Infrared light, 90° | 0-1000;  0-4000 |
| NO | SEBA, MPS-D8 | Infrared light 90° | 0-3200 |
| FI | S::CAN Spectrolyser 2mm and 5 mm | UV-VIS | 0-4000 |
| DK | Hach, Solitax | Infrared light, 90° | 0.001-4000 |

**Table S-II** Methods for collecting water samples for calibration. NA: Not applicable

| Country | Institute/data series | Automatic sampler (ISCO) | Hand grab samples | Event sampling (high water discharges) | Sampling at regular intervals (indicate interval) | Sampling site: High turbulence of water | Sampling site: Low turbulence of water | Good routines/site to avoid that ISCO draws bed/saltation sediments | Depth of sampling below surface | Sensor is placed in a monitoring shed, water is pumped in |
| --- | --- | --- | --- | --- | --- | --- | --- | --- | --- | --- |
| DK | Lyby-Grønning | X | X | X | Monthly |  | X | yes | Ca. 15 cm | no |
| DK | Horndrup | X | X | X | Monthly |  | X | yes | Ca. 15 cm | no |
| FI | Aurajoki |  | X | X | No regular interval1 |  | X | NA | 40 cm | no |
| FI | Hirvijoki |  | X | X | Monthly + event |  | X | NA | 40 cm | no |
| FI | Lepsämänjoki |  | X | X | Event based |  | X | NA | 15-50 cm from sensor depth | no |
| NO | Mørdre | X |  | X | Event samples | (x)* |  | yes | Ca 40 cm | no |
| NO | Skuterud | X |  | X | Event samples | (x)* |  | yes | Ca 30 cm | no |
| SE | Hågaån |  | X | X | 14 days + events | X |  | NA |  | No |
| SE | Skivarpsån |  | X | X | 14 days + events | X |  | NA |  | No |
| SE | Sävjaån |  | X |  | Monthly |  | X | NA |  | No |

* Sampled near V-weir at the most turbulent site.

**Table S-III** Number of samples used to calibrate TP from turbidity in each stream

| **Country** | **Name** | **No of samples** |
| --- | --- | --- |
| DK | Horndrup | 113 |
| DK | Lyby-Grønning | 86 |
| Fi | Aurajoki | 107 |
| FI | Hirvijoki | 65 |
| FI | Lepsämänjoki | 211 |
| NO | Mørdre | 155 |
| NO | Skuterud | 214 |
| SE | Hagaån | 137 |
| SE | Skivarp | 125 |
| SE | Sävjaån | 100 |

**Table S-IV** Analytical methods for determining TP

| **Rivers** | **Reference for analytical method TP (and uncertainty if available)** |
| --- | --- |
| Horndrup  Lyby-Grønning | Danish standard DS/EN ISO 6878:2004 |
| Aurajoki,  Hirvijoki  Lepsämänjoki | SFS 3026 mod. DA (uncertainty 15 %) |
| Mørdre  Skuterud | Norwegian standard NS-EN ISO 15681-2:2018 (Uncertainty 20-40 %). |
| Hågaån  Skivarpsån  Sävjaån | SS-EN ISO 6878:2005 |

**Table S-V** Estimated regression parameters, standard errors, t-values and p-values for Model 1

| Independent variable | Slope | Std. error | t-value | Probability |
| --- | --- | --- | --- | --- |
| n | -0.008413 | 0.001151 | -7.313 | <0.001 |
| log10(Catchment area) | -0.101920 | 0.042909 | -2.375 | 0.02 |
| Agricultural area% | 0.005200 | 0.001451 | 3.583 | <0.001 |
| log10(Discharge per area) | 0.089529 | 0.104507 | 0.857 | 0.40 |
| RBI | -0.206540 | 0.153381 | -1.347 | 0.19 |
| log10(98 Cl turbidity) | 0.064381 | 0.064824 | 0.993 | 0.33 |
| Intercept | 1.391436 | 0.250008 | 5.566 | <0.001 |
|  |  |  |  |  |
| Multiple R2 | 0.79 |  |  |  |
| Adjusted R2 | 0.75 |  |  |  |
| F-statistic | 23.16 |  |  |  |
| SEE | 0.1265 |  |  |  |
| Observations | 45 |  |  |  |
| Probability (p-value) | <0.001 |  |  |  |

**Table S-VI** Estimated regression parameters, standard errors, t-values and p-values for Model 2

| Independent variable | Slope | Std. error | t-value | Probability |
| --- | --- | --- | --- | --- |
| n | -0.00945164 | 0.00124997 | -7.562 | <0.001 |
| Agricultural area % | 0.00660639 | 0.00101061 | 6.537 | <0.001 |
| Catchment area | -0.00030467 | 0.00007724 | -3.944 | <0.001 |
| Intercept | 1.38116544 | 0.07322614 | 18.862 | <0.001 |
|  |  |  |  |  |
| Multiple R2 | 0.8013 |  |  |  |
| Adjusted R2 | 0.7868 |  |  |  |
| F-statistic | 55.11 |  |  |  |
| SEE | 0.1337 |  |  |  |
| Observations | 45 |  |  |  |
| Probability (p-value) | <0.001 |  |  |  |

**Table S-VII** Correlations (R2 and p-values) between turbidity and TP for the 10 streams. Streams with R2s in italic were not used in the assessment of the impact on sampling frequency on annual mean TP. Data for three years in each stream

| Country | Name | R2 | p-value |
| --- | --- | --- | --- |
| DK | Horndrup | 0.92 | 7,9 E-63 |
| DK | Lyby-Grønning | 0.81 | 4,7 E-32 |
| FI | Aurajoki | 0,77 | 1.1 E-35 |
| FI | Hirvijoki | 0.82 | 4,4 E-25 |
| FI | Lepsämänjoki | 0.85 | 5,6 E-87 |
| NO | Mørdre | *0.53* | 7,5 E-27 |
| NO | Skuterud | 0.66 | 3.2 E-51 |
| SE | Hågaån | *0.40* | 2.0 E-16 |
| SE | Sävjaån | 0.65 | 2,4 E-24 |
| SE | Skivarp | *0.25* | 3,7 E-09 |

**Table S-VIII** Mean, maximum and standard deviation (StDev)of water discharge (Q), flashiness index (RBI); mean, maximum, standard deviation (StDev), outliers, 95 and 98 percentiles of turbidity (turb); and mean and maximum TP concentration in the water samples used for calibration. Data shown per year

|  |  | **Water discharge factors** | | | | **Turbidity factors** | | | | | | **TP in water samples** | |
| --- | --- | --- | --- | --- | --- | --- | --- | --- | --- | --- | --- | --- | --- |
| **Name** | **Year** | **Mean**  **Q**  **l/s** | **Max**  **Q** | **StDev**  **Q** | **RBI** | **Mean**  **turb** | **Max**  **turb** | **StDev**  **turb** | **Outliers**  **turb** | **q95**  **turb** | **q98**  **turb** | **Mean**  **TP**  **µg/l** | **Max**  **TP**  **µg/l** |
| Horndrup | 2020 | 55 | 1732 | 95 | 0.29 | 18 | 1343 | 57 | 1209 | 57 | 127 | 93 | 4196 |
| Horndrup | 2021 | 48 | 835 | 51 | 0.28 | 17 | 821 | 40 | 1220 | 67 | 138 | 90 | 2581 |
| Horndrup | 2022 | 46 | 1187 | 66 | 0.24 | 12 | 511 | 26 | 817 | 36 | 77 | 75 | 1620 |
| Lyby-Grønning | 2020 | 80 | 1406 | 124 | 0.26 | 20 | 824 | 39 | 1046 | 77 | 128 | 164 | 3923 |
| Lyby-Grønning | 2021 | 42 | 446 | 50 | 0.26 | 38 | 1109 | 112 | 1168 | 143 | 383 | 250 | 5260 |
| Lyby-Grønning | 2022 | 45 | 700 | 77 | 0.26 | 20 | 963 | 46 | 1272 | 82 | 151 | 167 | 4577 |
| Hirvijoki | 2018 | 890 | 17310 | 1471 | 0,25 | 13 | 170 | 16 | 614 | 43 | 63 | 84 | 564 |
| Hirvijoki | 2019 | 2220 | 38200 | 4426 | 0.38 | 16 | 498 | 22 | 684 | 44 | 71 | 94 | 1564 |
| Hirvijoki | 2021 | 1932 | 26240 | 3045 | 0.32 | 28 | 828 | 26 | 686 | 68 | 87 | 130 | 2567 |
| Lepsämänjoki | 2018 | 162 | 2551 | 264 | 0.26 | 35 | 489 | 35 | 2045 | 101 | 150 | 81 | 630 |
| Lepsämänjoki | 2019 | 253 | 3643 | 374 | 0.29 | 34 | 1033 | 31 | 1061 | 84 | 111 | 79 | 1290 |
| Lepsämänjoki | 2020 | 343 | 3223 | 393 | 0.35 | 53 | 1022 | 52 | 1411 | 134 | 208 | 102 | 1277 |
| Aurajoki | 2018 | 3719 | 57521 | 6969 | 0.31 | 22 | 216 | 19 | 616 | 63 | 76 | 135 | 560 |
| Aurajoki | 2019 | 9062 | 112031 | 14325 | 0.32 | 28 | 436 | 32 | 637 | 91 | 120 | 149 | 1041 |
| Aurajoki | 2021 | 6971 | 64186 | 8641 | 0.32 | 34 | 215 | 23 | 338 | 75 | 91 | 163 | 557 |
| Mørdre | 2019 | 97 | 2257 | 209 | 0.63 | 167 | 3210 | 383 | 1101 | 594 | 1428 | 381 | 1881 |
| Mørdre | 2021 | 62 | 1466 | 116 | 0.48 | 138 | 3210 | 291 | 1083 | 521 | 1246 | 367 | 1881 |
| Mørdre | 2022 | 27 | 2212 | 100 | 0.74 | 110 | 2905 | 179 | 709 | 360 | 630 | 353 | 1731 |
| Skuterud | 2020 | 111 | 3339 | 238 | 0.68 | 62 | 2292 | 113 | 900 | 210 | 379 | 140 | 2038 |
| Skuterud | 2021 | 54 | 3059 | 162 | 0.52 | 41 | 1610 | 67 | 1258 | 156 | 199 | 122 | 1457 |
| Skuterud | 2022 | 49 | 3146 | 170 | 0.74 | 28 | 744 | 49 | 873 | 96 | 160 | 111 | 721 |
| Hågaån | 2019 | 1110 | 8199 | 1749 | 0.11 | 62 | 1291 | 84 | 479 | 183 | 305 | 89 | 847 |
| Hågaån | 2020 | 547 | 3285 | 559 | 0.10 | 35 | 460 | 30 | 613 | 99 | 129 | 73 | 334 |
| Hågaån | 2023 | 1759 | 14541 | 2510 | 0.13 | 39 | 386 | 40 | 749 | 109 | 179 | 75 | 289 |
| Skivarp | 2019 | 949 | 5824 | 1206 | 0.18 | 12 | 162 | 17 | 787 | 48 | 71 | 124 | 422 |
| Skivarp | 2020 | 671 | 5815 | 964 | 0.15 | 14 | 300 | 22 | 568 | 43 | 83 | 129 | 694 |
| Skivarp | 2022 | 900 | 7807 | 1452 | 0.16 | 17 | 620 | 36 | 849 | 62 | 124 | 134 | 1327 |
| Sävjaån | 2016 | 1928 | 7324 | 1922 | 0.05 | 17 | 449 | 27 | 356 | 37 | 62 | 58 | 609 |
| Sävjaån | 2017 | 2935 | 13550 | 3350 | 0.04 | 14 | 126 | 13 | 598 | 41 | 49 | 54 | 197 |
| Sävjaån | 2019 | 4585 | 31160 | 6488 | 0.06 | 11 | 76 | 15 | 997 | 50 | 62 | 50 | 133 |

**Supplementary figures**


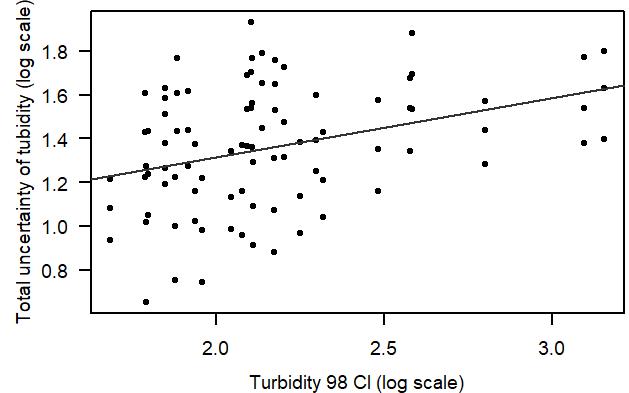

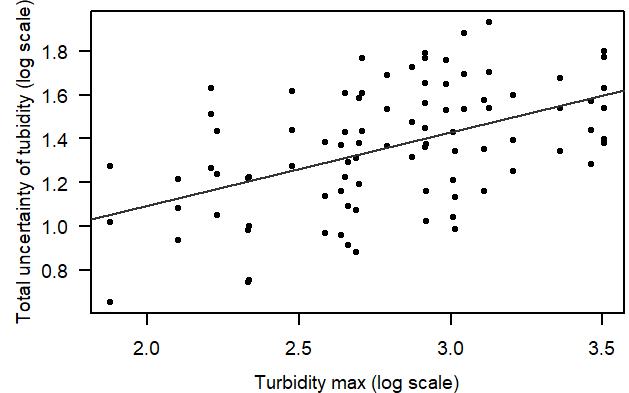

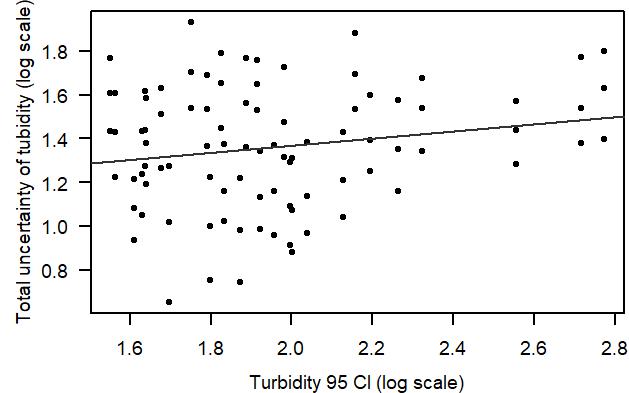

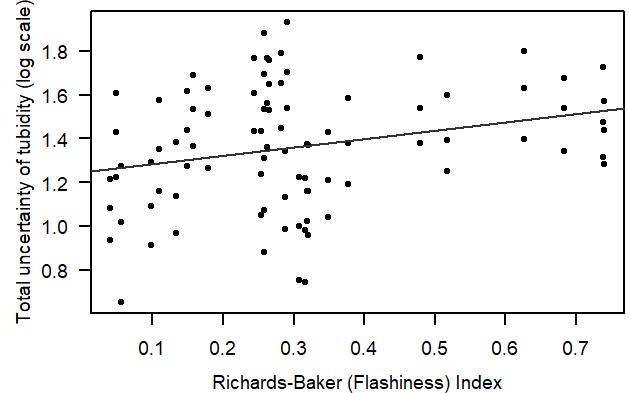

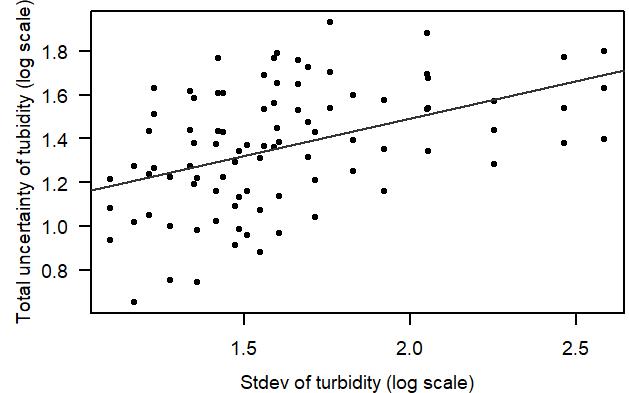

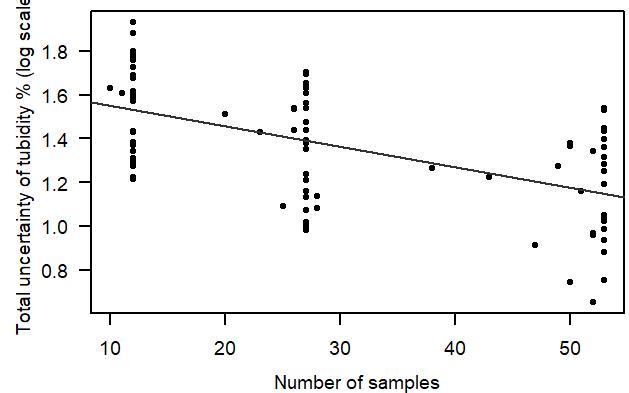

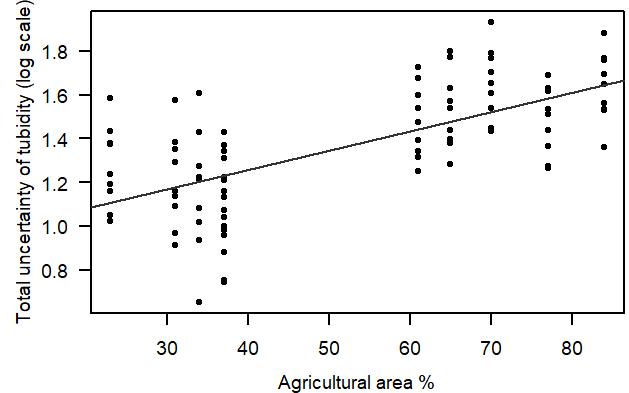

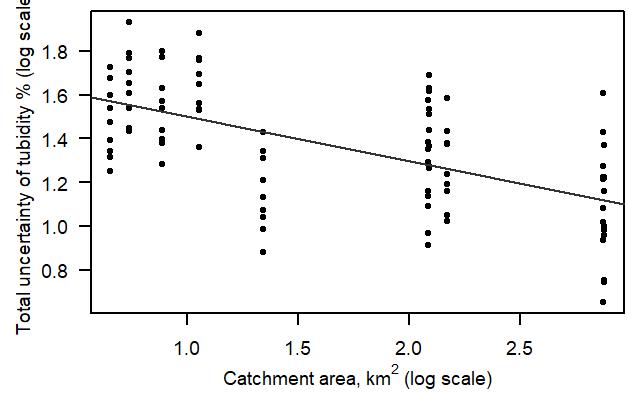

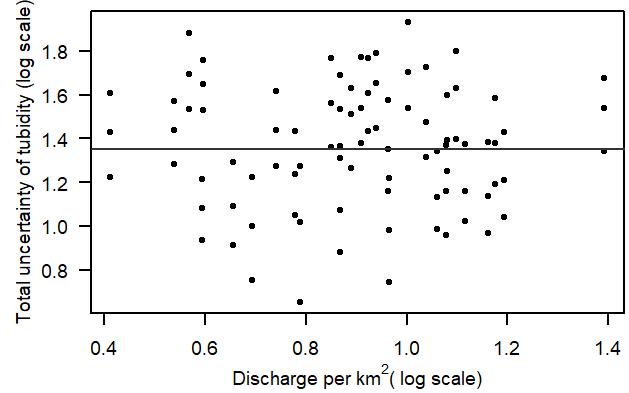

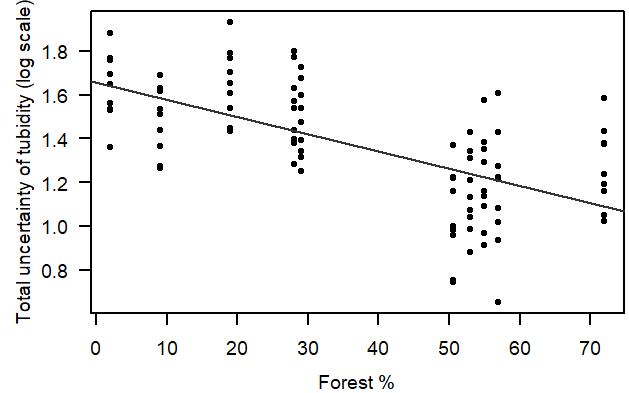

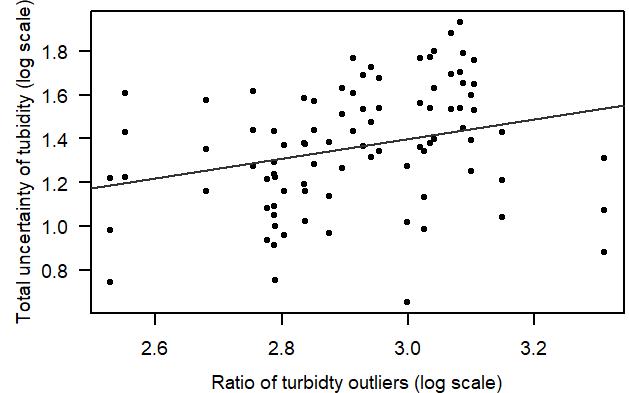


**Figure S-I** Calibrations between total uncertainty and tested possible explanatory factors


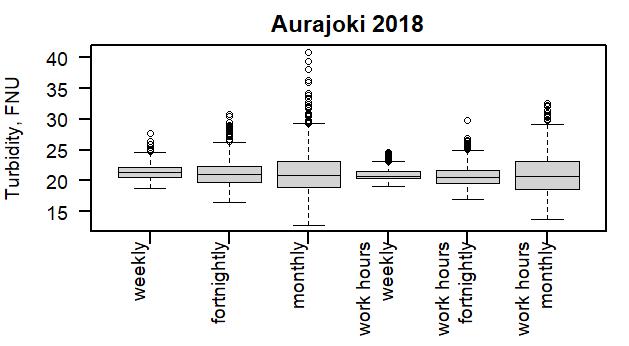

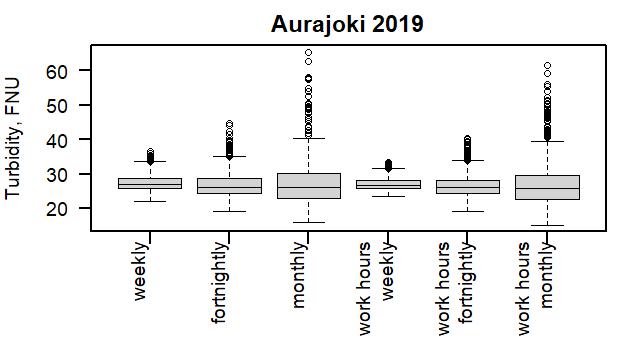

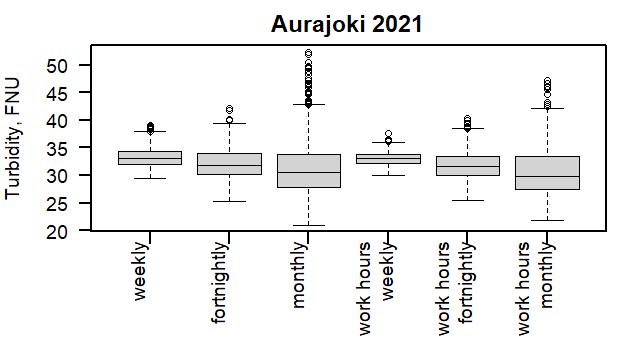

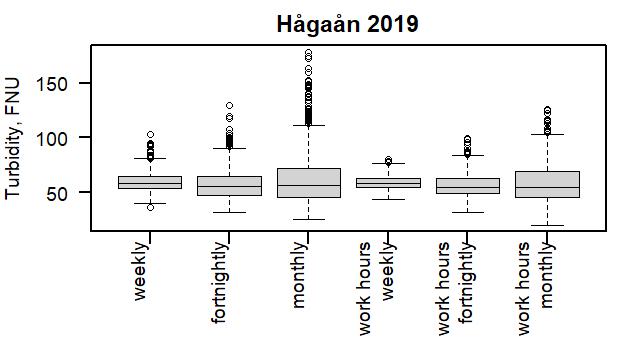

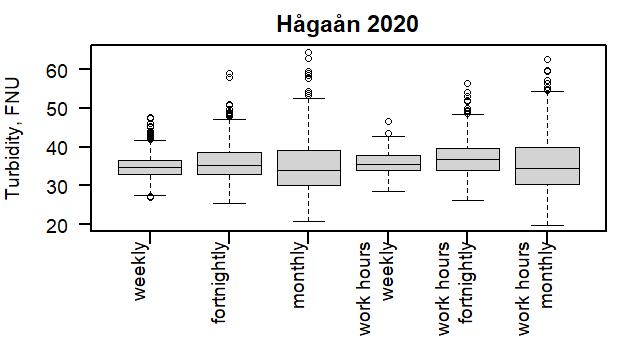

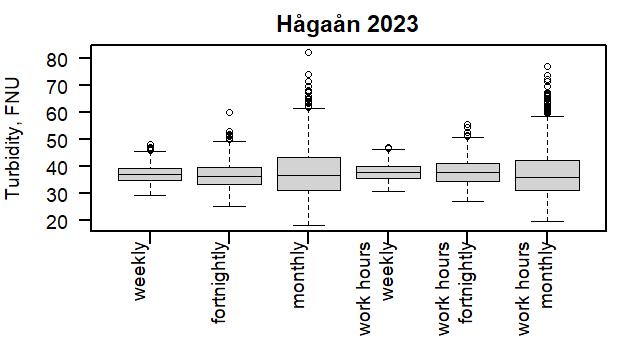

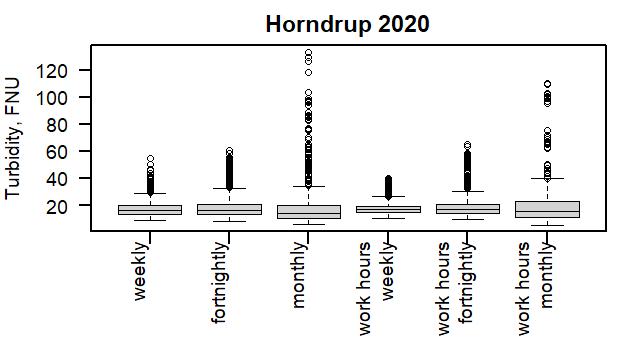

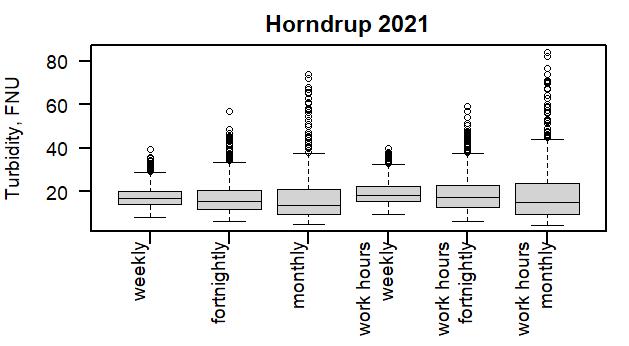

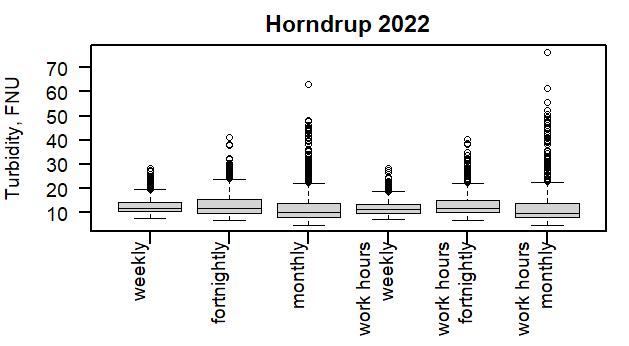

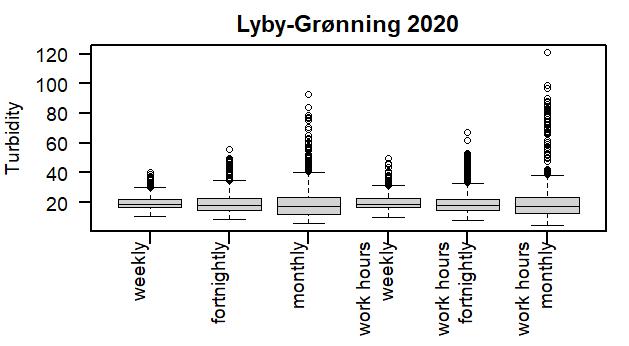

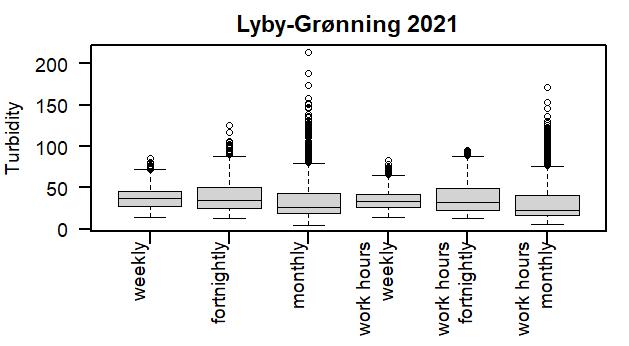

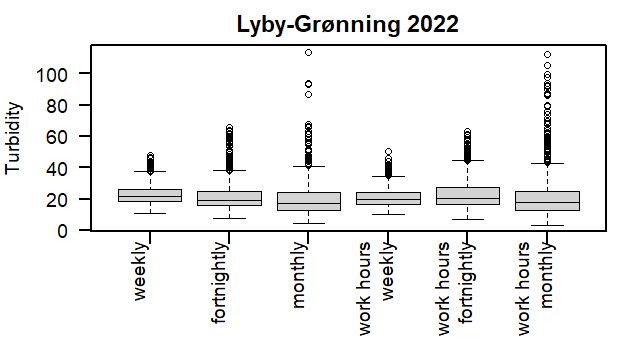

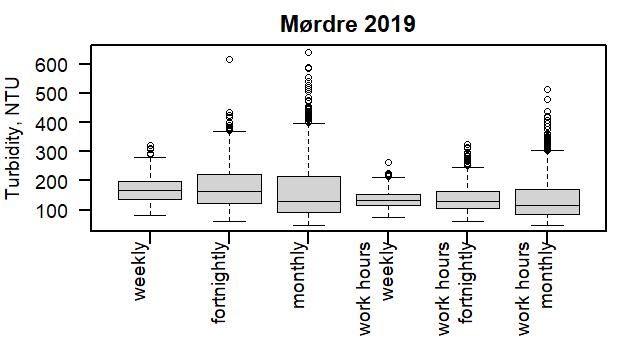

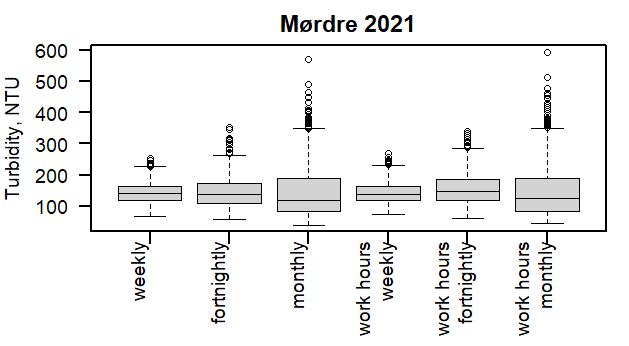

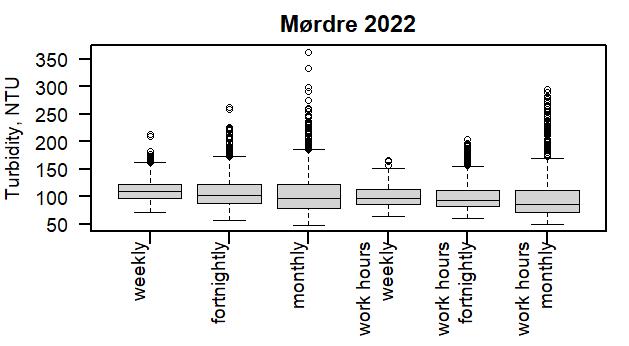

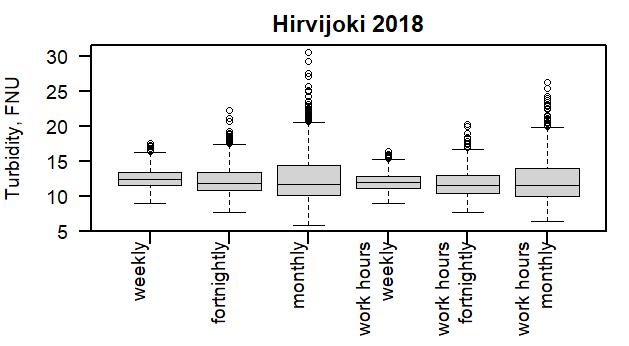

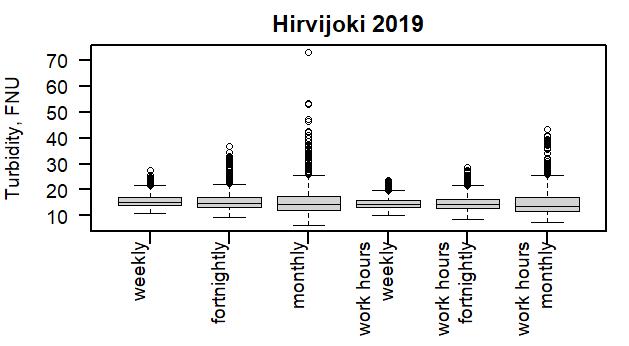

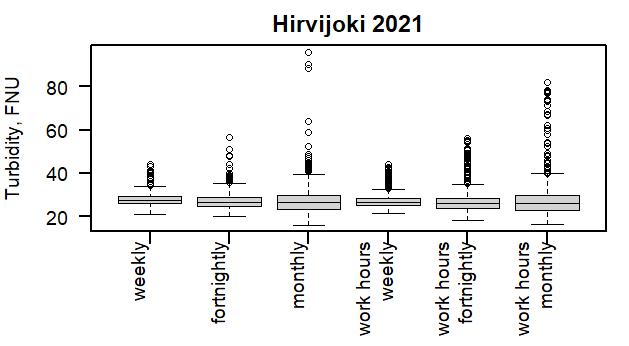

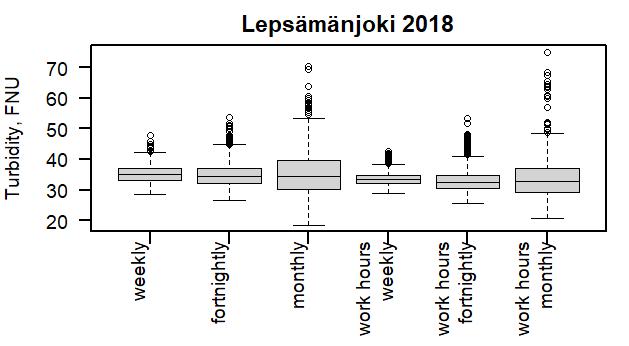

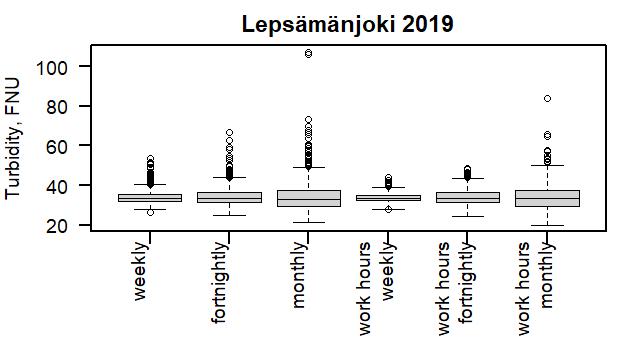

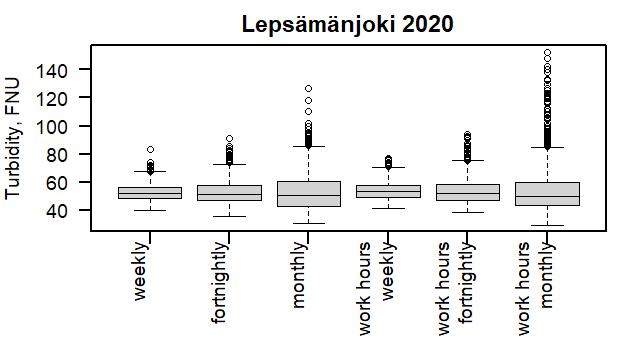

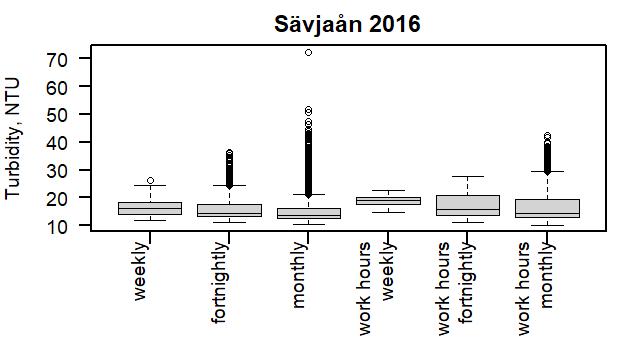

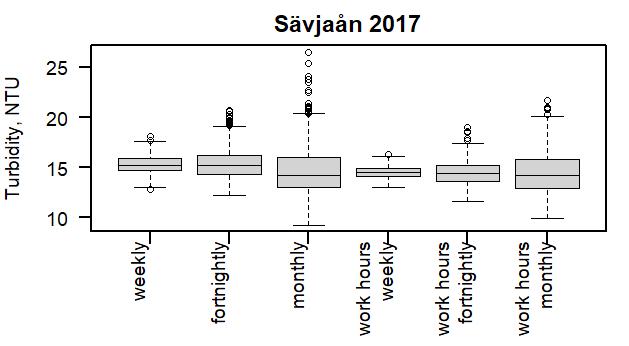

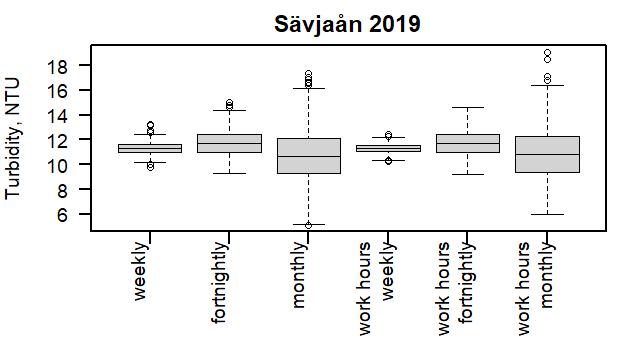

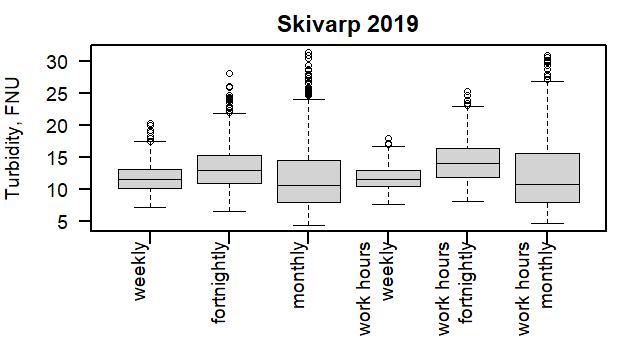

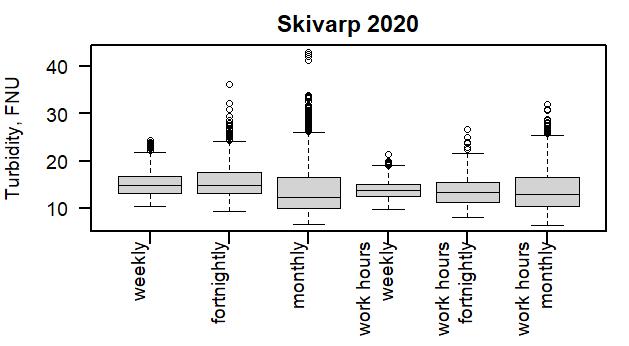

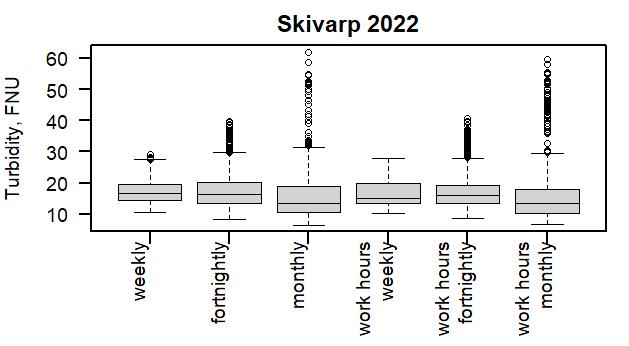

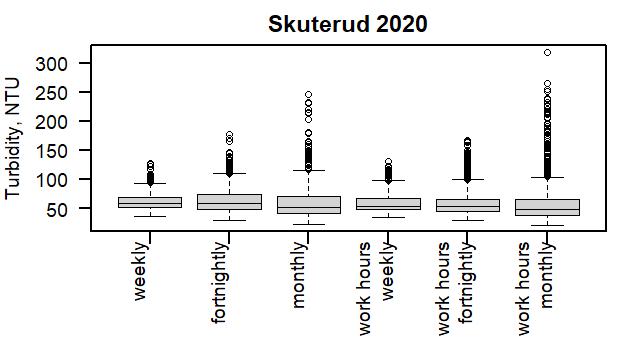

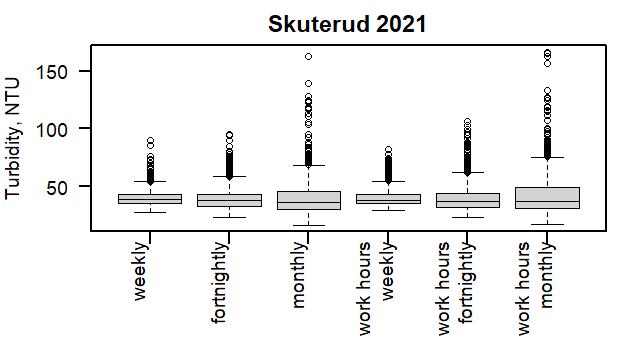

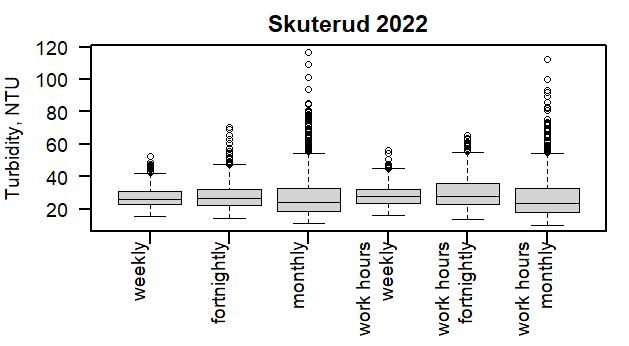


**Figure S-II** Mean turbidity, range for all streams and years. The grey boxes show the standard deviation, the horizontal line within the grey boxes represents the median value, and the vertical dashed lines show the maximum and minimum values

| 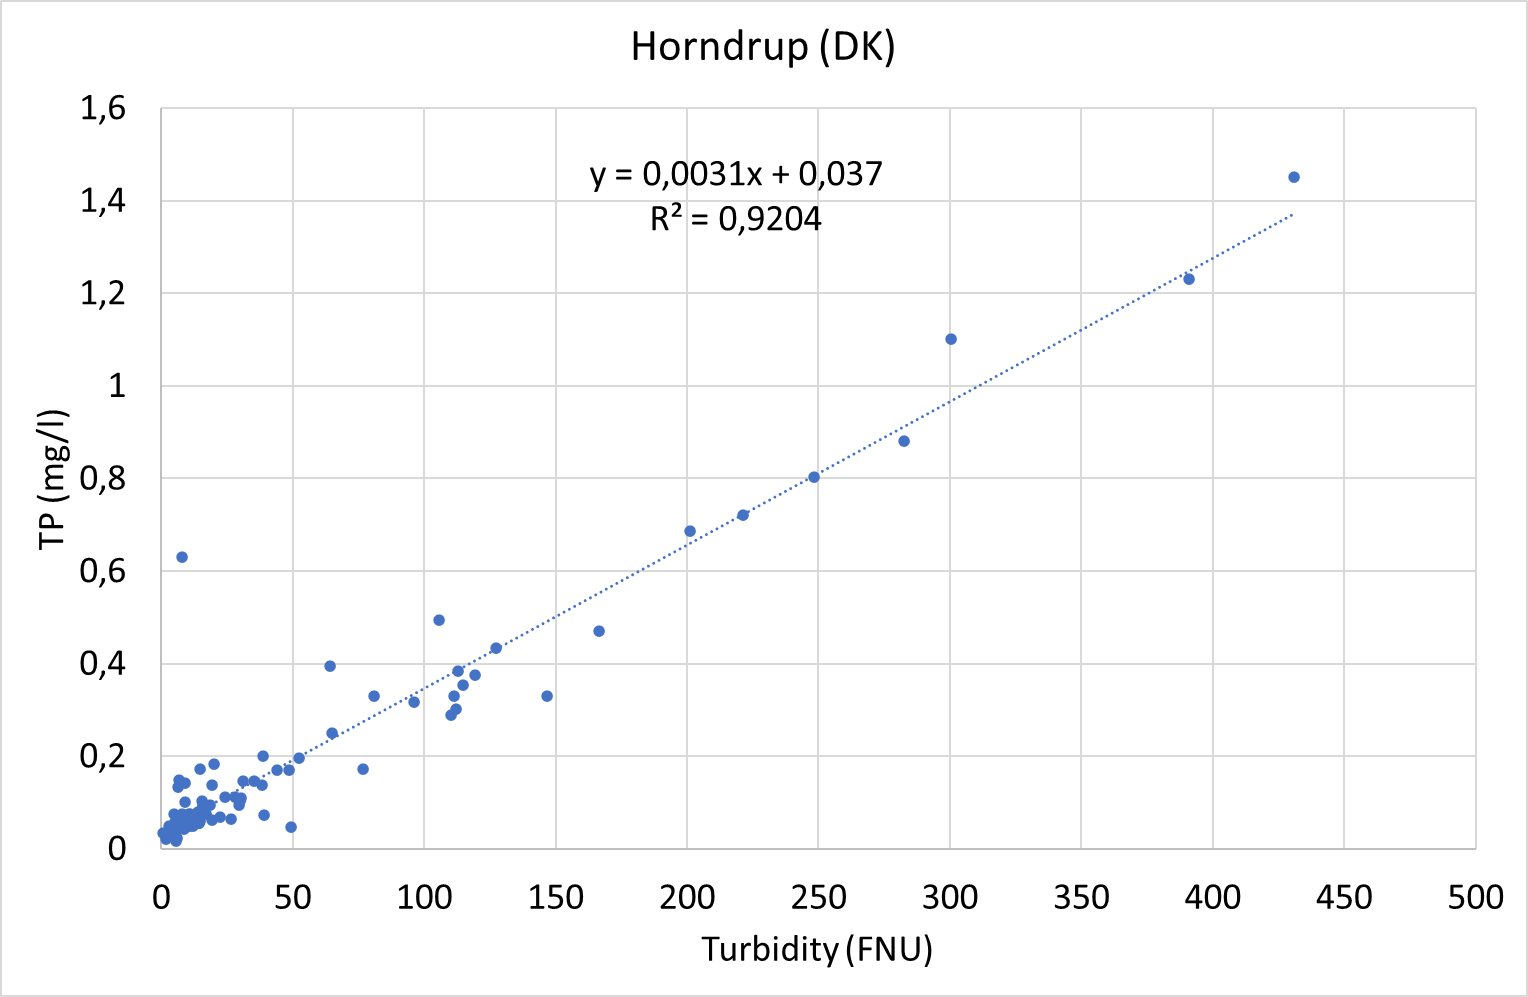 | 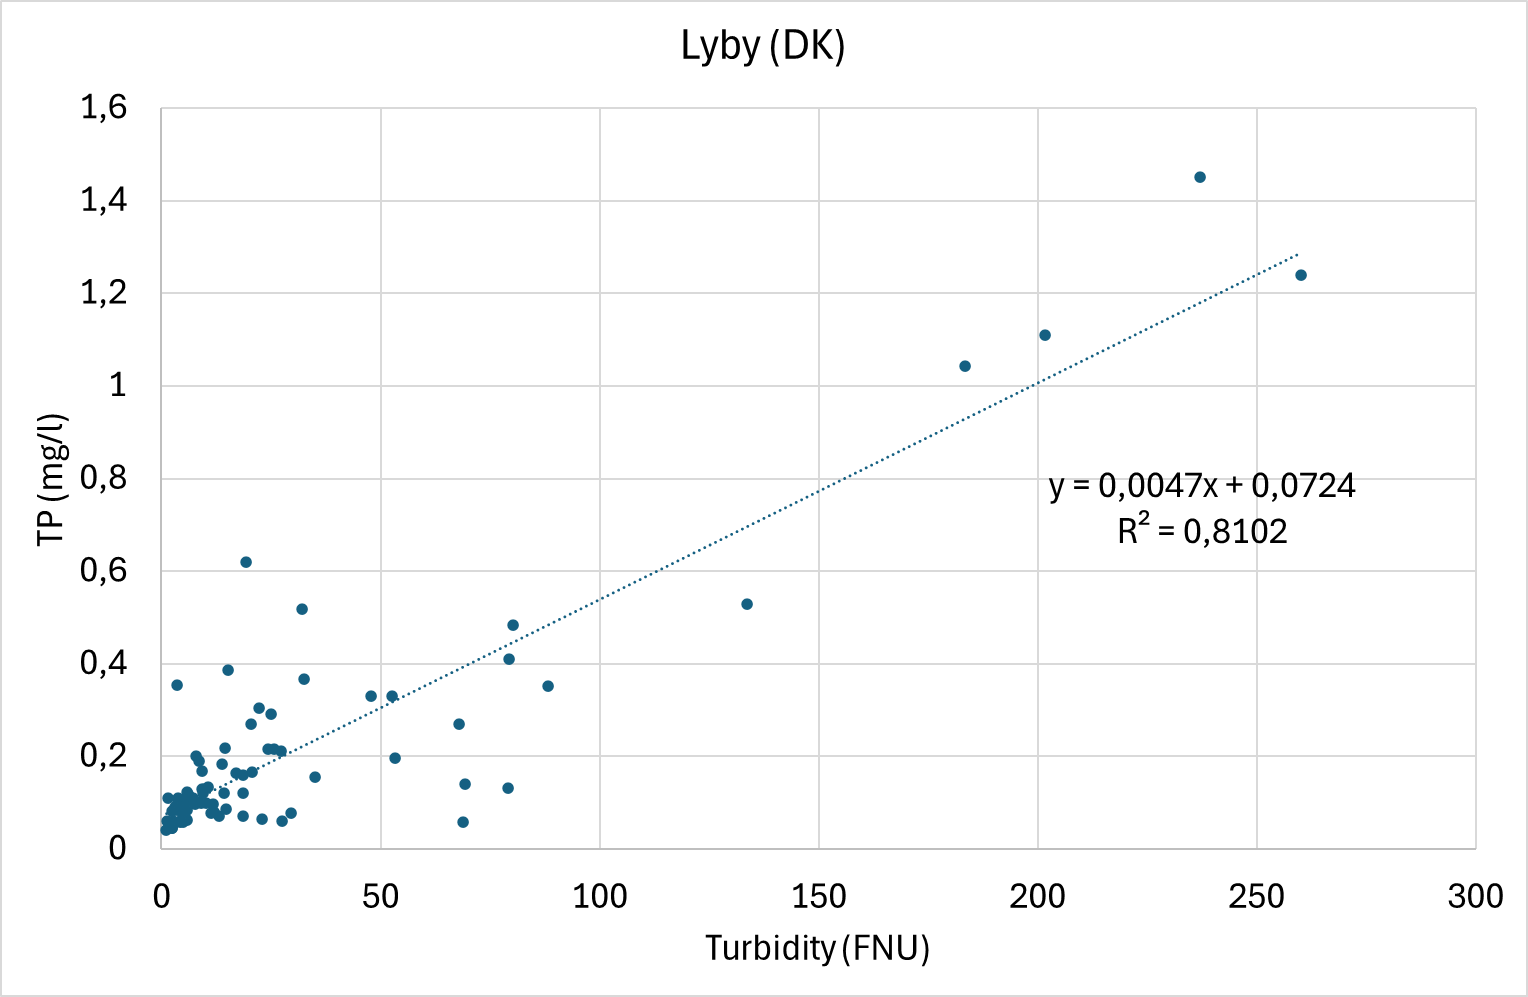 |
| --- | --- |
| 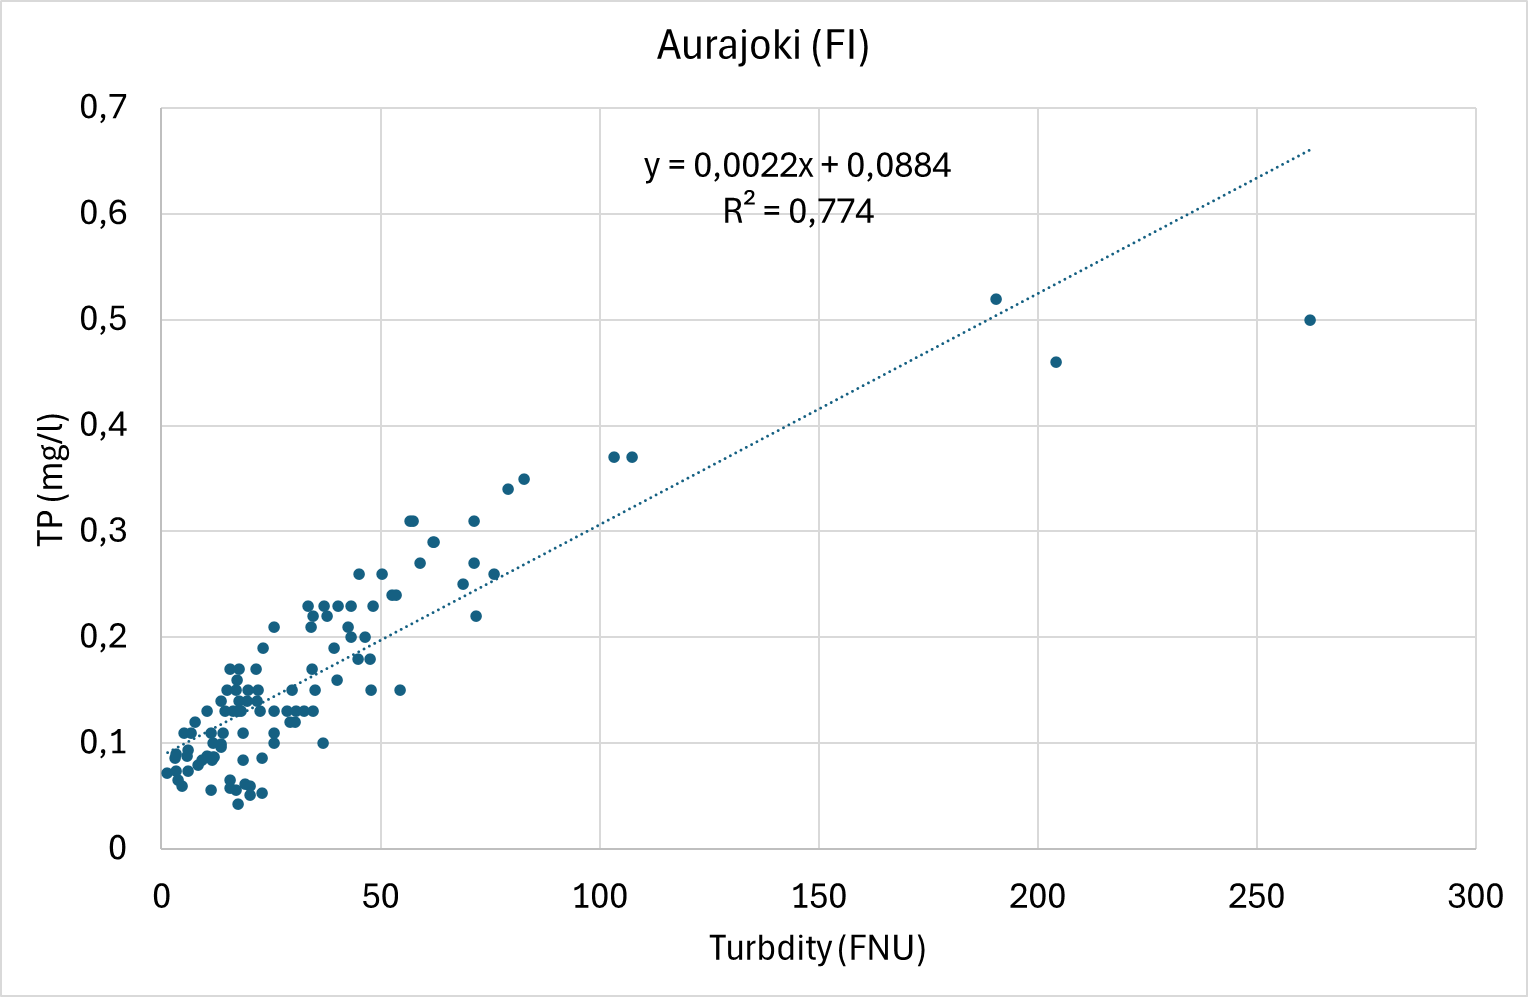 | 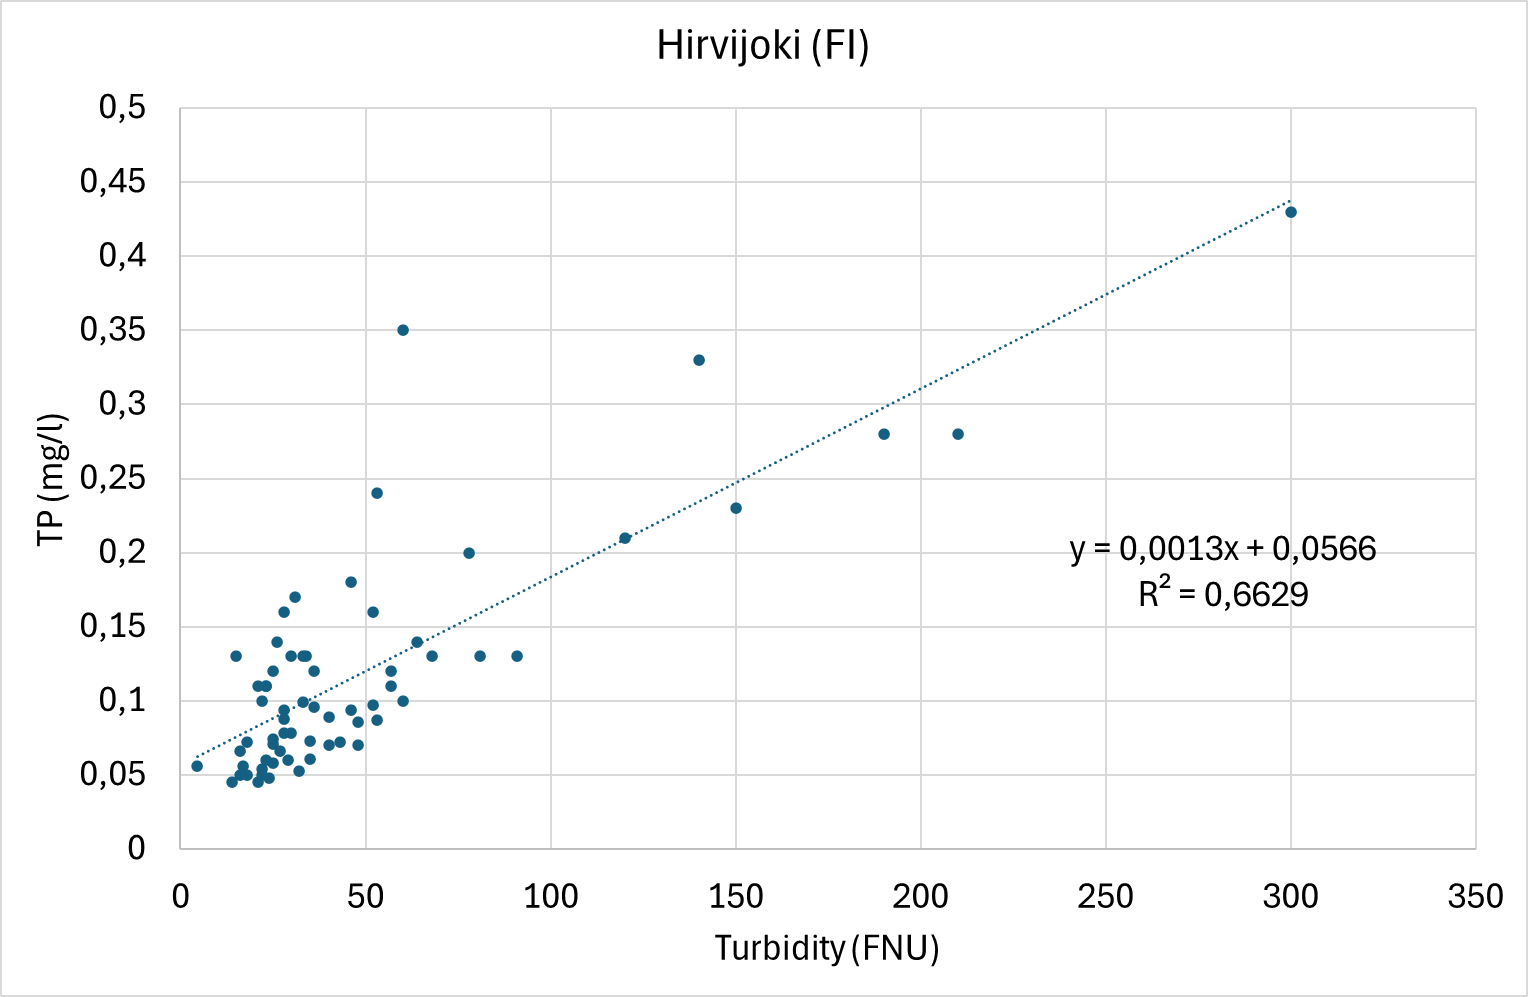 |
| 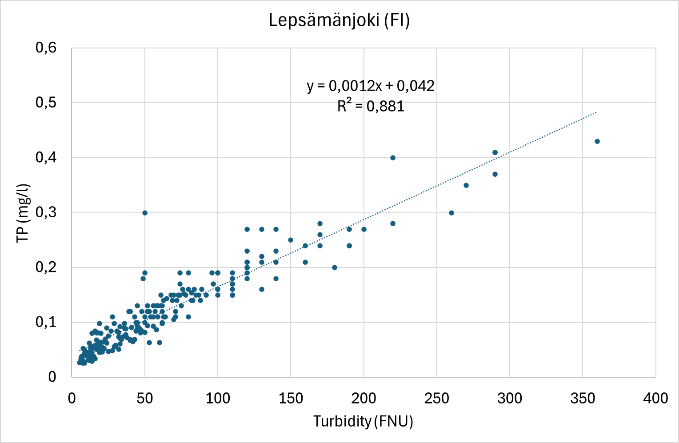 | 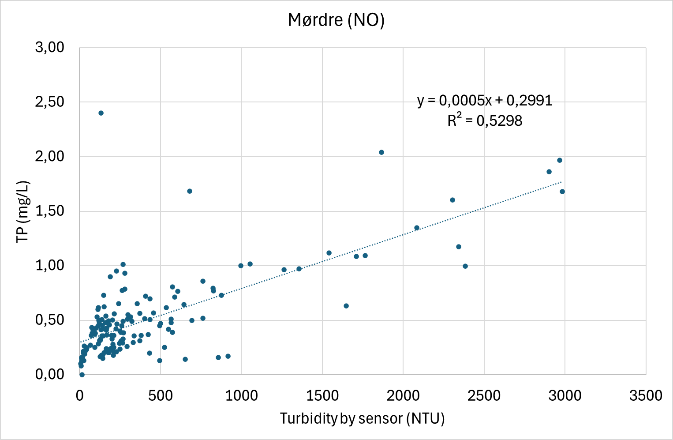 |
| 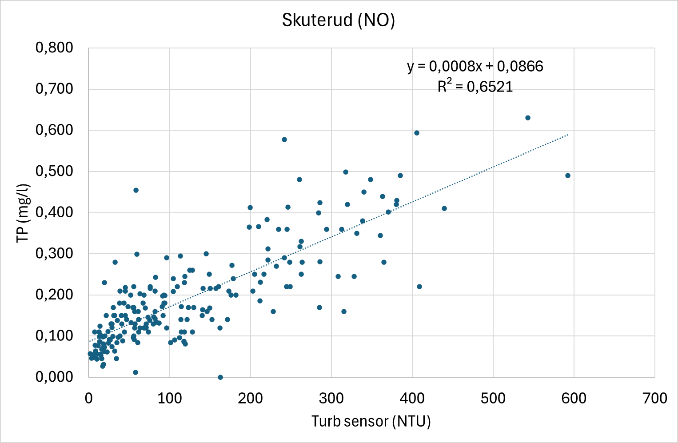 | 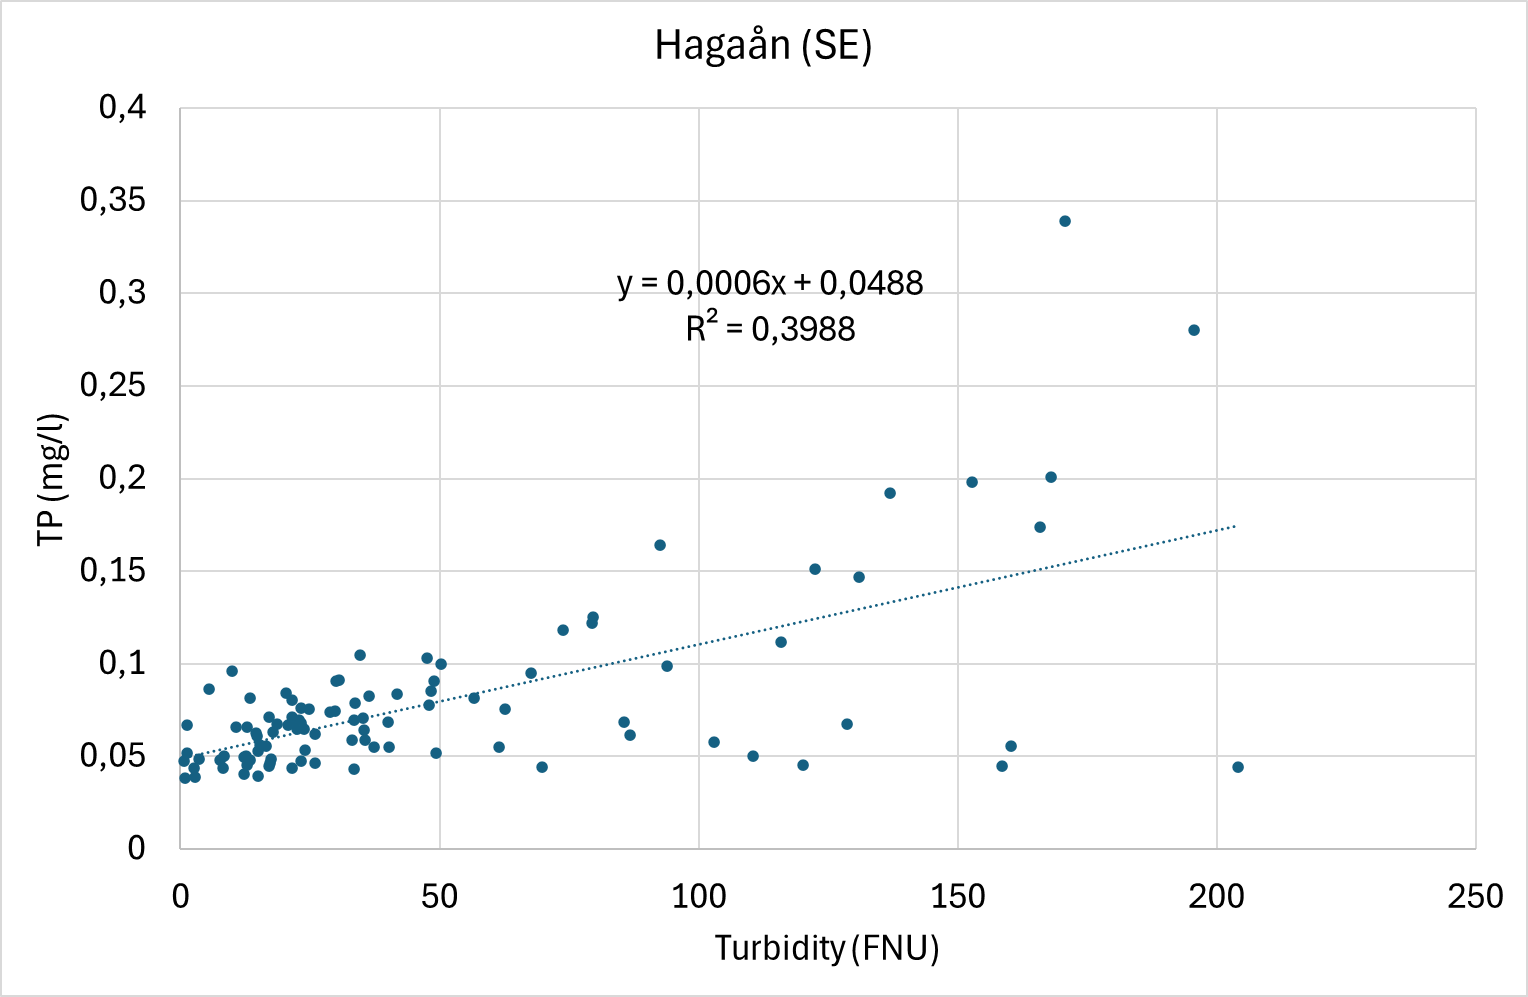 |
| 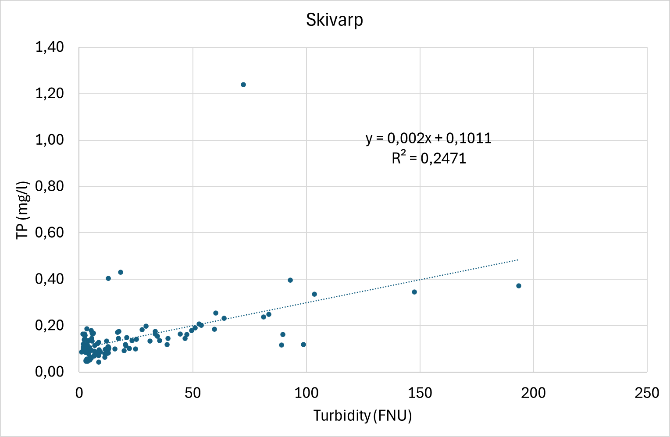 | 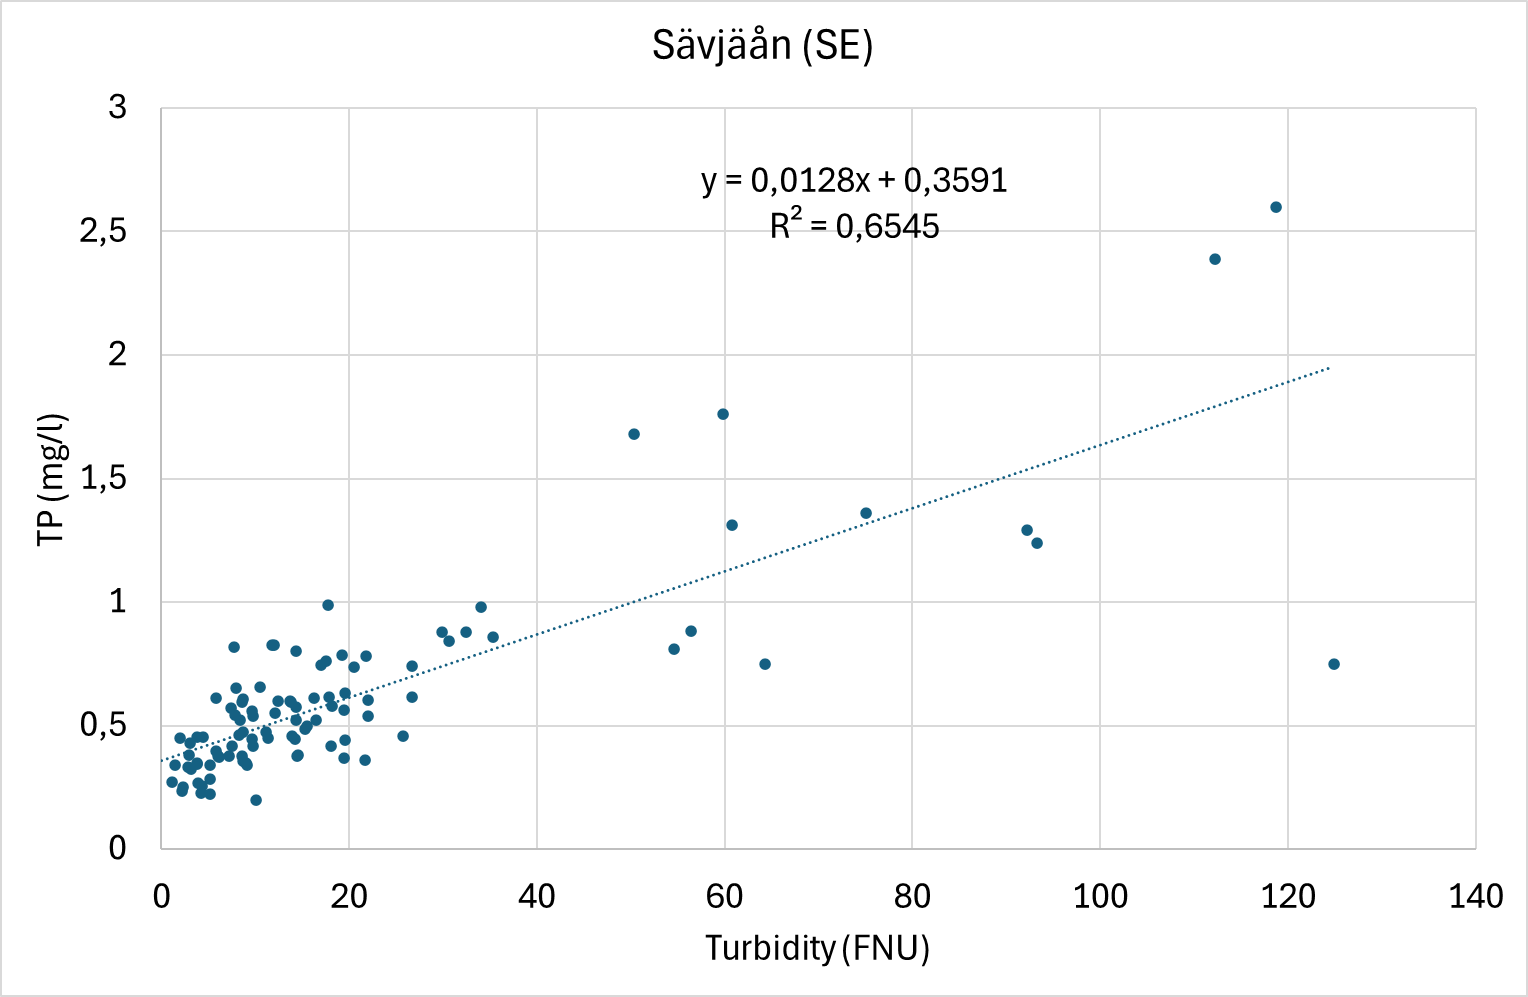 |

**Figure S-III** Calibrations, equations and R2s between turbidity by sensor (x-axis) and TP-concentrations from grab samples (y-axis) for the 10 case streams
